# Supplementary material
Source: MDPI journal article supplement (https://www.mdpi.com/1424-8247/14/12/1284)
Supplement: s1 [file s1]

Supplementary Material

# New Method for the Monitoring of Antidepressants in Oral Fluid Using Dried Spot Sampling

Sofia Soares, Tiago Rosado, Mário Barroso and Eugenia Gallardo

**Table S1.** MRM response and cross-contribution of quantifying transitions.

|                          | FLX   | VLX   | DVLX  | NFLX <sup>b</sup> | PTP <sup>a</sup> | CIT   | SRT   | PXT   |
|--------------------------|-------|-------|-------|-------------------|------------------|-------|-------|-------|
| <u>FLX</u>               | 100   | 2.051 | 0.663 | -                 | -                | 0.510 | -     | 0.034 |
| <u>VLX</u>               | 0.176 | 100   | -     | -                 | -                | 0.084 | -     | 0.005 |
| <u>DVLX</u>              | 0.078 | 0.199 | 100   | -                 | -                | 0.059 | -     | -     |
| <u>NFLX</u> <sup>b</sup> | 0.030 | 0.021 | -     | 100               | -                | 0.038 | -     | 0.009 |
| <u>PTP</u> <sup>a</sup>  | 0.017 | 0.315 | -     | -                 | 100              | 0.037 | -     | 0.003 |
| <u>CIT</u>               | 0.015 | 0.011 | -     | -                 | 0.467            | 100   | -     | 0.002 |
| <u>SRT</u>               | 0.016 | 0.041 | -     | -                 | 0.051            | 0.400 | 100   | 0.001 |
| <u>PXT</u>               | 0.018 | 0.020 | -     | -                 | 0.022            | 0.050 | 0.025 | 100   |

<sup>a</sup> Internal standard; <sup>b</sup> Only for qualitative purposes. Underlined antidepressants were injected isolated, and bold antidepressants report the contribution (%) when underlined antidepressants were injected.

**Table S2.** Effects of the different organic solvents and/or mixtures in the extraction process ( $n = 3$ ).

|             | FLX          |           |               | VLX          |           |               | DVLX         |           |               | NFLX         |           |               | CIT          |           |               | SRT          |           |               | PXT          |           |               |
|-------------|--------------|-----------|---------------|--------------|-----------|---------------|--------------|-----------|---------------|--------------|-----------|---------------|--------------|-----------|---------------|--------------|-----------|---------------|--------------|-----------|---------------|
|             | Analyte Area | PI Area   | Relative Area | Analyte Area | PI Area   | Relative Area | Analyte Area | PI Area   | Relative Area | Analyte Area | PI Area   | Relative Area | Analyte Area | PI Area   | Relative Area | Analyte Area | PI Area   | Relative Area | Analyte Area | PI Area   | Relative Area |
| MeOH        | 860466       | 8210737   | 0.1048        | 1599875      | 8210737   | 0.1949        | 1713372      | 8210737   | 0.2087        | 135473       | 8210737   | 0.0165        | 327868       | 8210737   | 0.0399        | 31503        | 8210737   | 0.0038        | 499971       | 8210737   | 0.0609        |
|             | 706761       | 7166032   | 0.0986        | 1473541      | 7166032   | 0.2056        | 1395478      | 7166032   | 0.1947        | 117782       | 7166032   | 0.0164        | 292205       | 7166032   | 0.0408        | 24888        | 7166032   | 0.0035        | 483120       | 7166032   | 0.0674        |
|             | 901151       | 9833349   | 0.0916        | 1647105      | 9833349   | 0.1675        | 1595374      | 9833349   | 0.1622        | 146707       | 9833349   | 0.0166        | 373530       | 9833349   | 0.0380        | 32463        | 9833349   | 0.0033        | 652752       | 9833349   | 0.0664        |
| Mean        | 822792.7     | 8403372.7 | 0.0984        | 1573507.0    | 8403372.7 | 0.1893        | 1568074.7    | 8403372.7 | 0.1886        | 133320.7     | 8070039.3 | 0.0165        | 331201.0     | 8403372.7 | 0.0396        | 29618.0      | 8403372.7 | 0.0035        | 545281.0     | 8403372.7 | 0.0649        |
| Std Dev     | 102524.8     | 1344052.2 | 0.0066        | 89736.1      | 1344052.2 | 0.0197        | 160695.6     | 1344052.2 | 0.0238        | 14582.1      | 842516.1  | 0.0001        | 40764.8      | 1344052.2 | 0.0014        | 4124.3       | 1344052.2 | 0.0003        | 93453.2      | 1344052.2 | 0.0035        |
| CV          | 12.46%       | 15.99%    | 6.69%         | 5.70%        | 15.99%    | 10.38%        | 10.25%       | 15.99%    | 12.64%        | 10.94%       | 10.44%    | 0.53%         | 12.31%       | 15.99%    | 3.62%         | 13.93%       | 15.99%    | 7.73%         | 17.14%       | 15.99%    | 5.40%         |
| MeOH pH 5   | 936354       | 9526586   | 0.0983        | 1472733      | 9526586   | 0.1546        | 1544460      | 9526586   | 0.1621        | 184691       | 9526586   | 0.0194        | 360813       | 9526586   | 0.0379        | 32965        | 9526586   | 0.0035        | 664109       | 9526586   | 0.0697        |
|             | 761083       | 8300347   | 0.0917        | 1421332      | 8300347   | 0.1712        | 1346030      | 8300347   | 0.1622        | 163027       | 8300347   | 0.0196        | 297592       | 8300347   | 0.0359        | 20298        | 8300347   | 0.0024        | 517922       | 8300347   | 0.0624        |
|             | 872938       | 11691963  | 0.0747        | 1627597      | 11691963  | 0.1392        | 1438157      | 11691963  | 0.1230        | 158149       | 11691963  | 0.0135        | 321991       | 11691963  | 0.0275        | 29930        | 11691963  | 0.0026        | 719602       | 11691963  | 0.0615        |
| Mean        | 856791.7     | 9839632.0 | 0.0882        | 1507220.7    | 9839632.0 | 0.1550        | 1442882.3    | 9839632.0 | 0.1491        | 168622.3     | 9839632.0 | 0.0175        | 326798.7     | 9839632.0 | 0.0338        | 27731.0      | 9839632.0 | 0.0028        | 633877.7     | 9839632.0 | 0.0646        |
| Std Dev     | 88744.1      | 1717341.9 | 0.0122        | 107370.2     | 1717341.9 | 0.0160        | 99299.4      | 1717341.9 | 0.0226        | 14128.0      | 1717341.9 | 0.0035        | 31883.5      | 1717341.9 | 0.0055        | 6613.6       | 1717341.9 | 0.0006        | 104183.3     | 1717341.9 | 0.0045        |
| CV          | 10.36%       | 17.45%    | 13.82%        | 7.12%        | 17.45%    | 10.33%        | 6.88%        | 17.45%    | 15.16%        | 8.38%        | 17.45%    | 19.75%        | 9.76%        | 17.45%    | 16.23%        | 23.85%       | 17.45%    | 19.70%        | 16.44%       | 17.45%    | 6.95%         |
| ACN         | 820705       | 11426017  | 0.0718        | 2460078      | 11426017  | 0.2153        | 469729       | 11426017  | 0.0411        | 379748       | 11426017  | 0.0332        | 285973       | 11426017  | 0.0250        | 26471        | 11426017  | 0.0023        | 423049       | 11426017  | 0.0370        |
|             | 566636       | 8342436   | 0.0679        | 904704       | 8342436   | 0.1084        | 515677       | 8342436   | 0.0618        | 470380       | 8342436   | 0.0564        | 306260       | 8342436   | 0.0367        | 25337        | 8342436   | 0.0030        | 278306       | 8342436   | 0.0334        |
|             | 601916       | 5422523   | 0.1110        | 443181       | 5422523   | 0.0817        | 347623       | 5422523   | 0.0641        | 432425       | 5422523   | 0.0797        | 204559       | 5422523   | 0.0377        | 23397        | 5422523   | 0.0043        | 236536       | 5422523   | 0.0436        |
| Mean        | 663085.7     | 8396992.0 | 0.0836        | 1269321.0    | 8396992.0 | 0.1352        | 444343.0     | 8396992.0 | 0.0557        | 427517.7     | 8396992.0 | 0.0565        | 265597.3     | 8396992.0 | 0.0332        | 25068.3      | 8396992.0 | 0.0032        | 312630.3     | 8396992.0 | 0.0380        |
| Std Dev     | 137637.4     | 3002118.8 | 0.0238        | 1056729.6    | 3002118.8 | 0.0707        | 86855.5      | 3002118.8 | 0.0127        | 45514.8      | 3002118.8 | 0.0233        | 53825.2      | 3002118.8 | 0.0071        | 1554.5       | 3002118.8 | 0.0010        | 97879.5      | 3002118.8 | 0.0052        |
| CV          | 20.76%       | 35.75%    | 28.50%        | 83.25%       | 35.75%    | 52.29%        | 19.55%       | 35.75%    | 22.75%        | 10.65%       | 35.75%    | 41.19%        | 20.27%       | 35.75%    | 21.28%        | 6.20%        | 35.75%    | 31.40%        | 31.31%       | 35.75%    | 13.68%        |
| ACN pH 5    | 455040       | 7695163   | 0.0591        | 481095       | 7695163   | 0.0625        | 290744       | 7695163   | 0.0378        | 1261         | 7695163   | 0.0002        | 164236       | 7695163   | 0.0213        | 12180        | 7695163   | 0.0016        | 168592       | 7695163   | 0.0219        |
|             | 871928       | 8797119   | 0.0991        | 558904       | 8797119   | 0.0635        | 320134       | 8797119   | 0.0364        | 3271         | 8797119   | 0.0004        | 196804       | 8797119   | 0.0224        | 18462        | 8797119   | 0.0021        | 354876       | 8797119   | 0.0403        |
|             | 632927       | 8288731   | 0.0764        | 676254       | 8288731   | 0.0816        | 317857       | 8288731   | 0.0383        | 4977         | 8288731   | 0.0006        | 170375       | 8288731   | 0.0206        | 16127        | 8288731   | 0.0019        | 205249       | 8288731   | 0.0248        |
| Mean        | 653298.3     | 8260337.7 | 0.0782        | 572084.3     | 8260337.7 | 0.0692        | 309578.3     | 8260337.7 | 0.0375        | 3169.7       | 8260337.7 | 0.0004        | 177138.3     | 8260337.7 | 0.0214        | 15589.7      | 8260337.7 | 0.0019        | 242905.7     | 8260337.7 | 0.0290        |
| Std Dev     | 209189.3     | 551526.4  | 0.0201        | 98244.8      | 551526.4  | 0.0107        | 16350.7      | 551526.4  | 0.0010        | 1860.1       | 551526.4  | 0.0002        | 17305.4      | 551526.4  | 0.0009        | 3175.3       | 551526.4  | 0.0003        | 98686.1      | 551526.4  | 0.0099        |
| CV          | 32.02%       | 6.68%     | 25.64%        | 17.17%       | 6.68%     | 15.50%        | 5.28%        | 6.68%     | 2.69%         | 58.68%       | 6.68%     | 57.66%        | 9.77%        | 6.68%     | 4.25%         | 20.37%       | 6.68%     | 14.12%        | 40.63%       | 6.68%     | 34.20%        |
| MeOH:ACN    | 415073       | 5581492   | 0.0744        | 1075264      | 5581492   | 0.1926        | 1162117      | 5581492   | 0.2082        | 11650        | 5581492   | 0.0021        | 252786       | 5581492   | 0.0453        | 14181        | 5581492   | 0.0025        | 236608       | 5581492   | 0.0424        |
|             | 591323       | 8515466   | 0.0694        | 1187896      | 8515466   | 0.1395        | 1192243      | 8515466   | 0.1400        | 10351        | 8515466   | 0.0012        | 265382       | 8515466   | 0.0312        | 20092        | 8515466   | 0.0024        | 357181       | 8515466   | 0.0419        |
|             | 458414       | 4767391   | 0.0962        | 974535       | 4767391   | 0.2044        | 1061614      | 4767391   | 0.2227        | 10421        | 4767391   | 0.0022        | 211456       | 4767391   | 0.0444        | 14932        | 4767391   | 0.0031        | 217876       | 4767391   | 0.0457        |
| Mean        | 488270.0     | 6288116.3 | 0.0800        | 1079231.7    | 6288116.3 | 0.1789        | 1138658.0    | 6288116.3 | 0.1903        | 10807.3      | 6288116.3 | 0.0018        | 243208.0     | 6288116.3 | 0.0403        | 16401.7      | 6288116.3 | 0.0027        | 270555.0     | 6288116.3 | 0.0433        |
| Std Dev     | 91839.8      | 1971422.1 | 0.0142        | 106735.8     | 1971422.1 | 0.0346        | 68401.2      | 1971422.1 | 0.0442        | 730.6        | 1971422.1 | 0.0005        | 28210.1      | 1971422.1 | 0.0079        | 3217.9       | 1971422.1 | 0.0004        | 75602.7      | 1971422.1 | 0.0021        |
| CV          | 18.81%       | 31.35%    | 17.77%        | 9.89%        | 31.35%    | 19.34%        | 6.01%        | 31.35%    | 23.20%        | 6.76%        | 31.35%    | 29.19%        | 11.60%       | 31.35%    | 19.62%        | 19.62%       | 31.35%    | 15.09%        | 27.94%       | 31.35%    | 4.73%         |
| Isopropanol | 716865       | 10055622  | 0.0713        | 366524       | 10055622  | 0.0364        | 145598       | 10055622  | 0.0145        | 73184        | 10055622  | 0.0073        | 131517       | 10055622  | 0.0131        | 17770        | 10055622  | 0.0018        | 263464       | 10055622  | 0.0262        |
|             | 546148       | 6099096   | 0.0895        | 266159       | 6099096   | 0.0436        | 160999       | 6099096   | 0.0264        | 14794        | 6099096   | 0.0024        | 129439       | 6099096   | 0.0212        | 14035        | 6099096   | 0.0023        | 194561       | 6099096   | 0.0319        |
|             | 665028       | 9409039   | 0.0707        | 300355       | 9409039   | 0.0319        | 144594       | 9409039   | 0.0154        | 46815        | 9409039   | 0.0050        | 113989       | 9409039   | 0.0121        | 13295        | 9409039   | 0.0014        | 258444       | 9409039   | 0.0275        |
| Mean        | 642680.3     | 8521252.3 | 0.0772        | 311012.7     | 8521252.3 | 0.0373        | 150397.0     | 8521252.3 | 0.0187        | 44931.0      | 8521252.3 | 0.0049        | 124981.7     | 8521252.3 | 0.0155        | 15033.3      | 8521252.3 | 0.0018        | 238823.0     | 8521252.3 | 0.0285        |
| Std Dev     | 87525.1      | 2122415.7 | 0.0107        | 51024.2      | 2122415.7 | 0.0059        | 9195.3       | 2122415.7 | 0.0066        | 29240.6      | 2122415.7 | 0.0024        | 9576.5       | 2122415.7 | 0.0050        | 2398.7       | 2122415.7 | 0.0004        | 38414.1      | 2122415.7 | 0.0030        |
| CV          | 13.62%       | 24.91%    | 13.89%        | 16.41%       | 24.91%    | 15.83%        | 6.11%        | 24.91%    | 35.41%        | 65.08%       | 24.91%    | 49.61%        | 7.66%        | 24.91%    | 32.34%        | 15.96%       | 24.91%    | 24.47%        | 16.08%       | 24.91%    | 10.49%        |

Mean values  $\pm$  standard deviation and coefficient of variation.

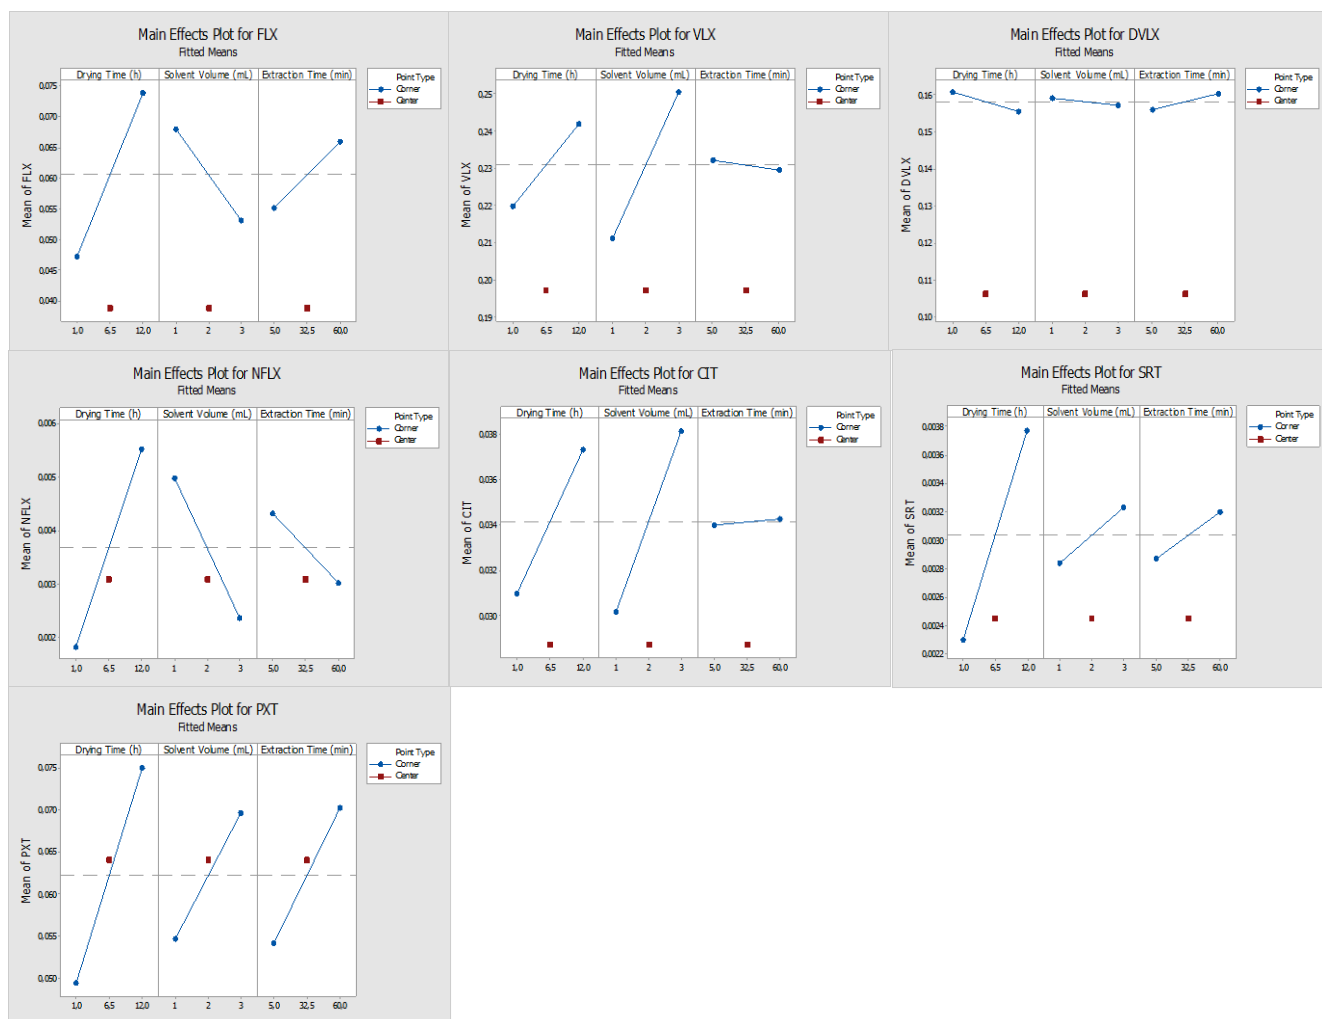

**Figure S1.** Main effects plots of drying time, solvent volume and extraction time for the compounds under study.

**Table S3.** Effects of the different solvent volumes ( $n = 3$ ) in the extraction process.

|         | FLX          |           |               | VLX          |           |               | DVLX         |           |               | NFLX         |           |               | CIT          |           |               | SRT          |           |               | PXT          |           |               |
|---------|--------------|-----------|---------------|--------------|-----------|---------------|--------------|-----------|---------------|--------------|-----------|---------------|--------------|-----------|---------------|--------------|-----------|---------------|--------------|-----------|---------------|
|         | Analyte Area | PI Area   | Relative Area | Analyte Area | PI Area   | Relative Area | Analyte Area | PI Area   | Relative Area | Analyte Area | PI Area   | Relative Area | Analyte Area | PI Area   | Relative Area | Analyte Area | PI Area   | Relative Area | Analyte Area | PI Area   | Relative Area |
| 1 mL    | 1398967      | 4932691   | 0.2836        | 2257212      | 4932691   | 0.4576        | 2088925      | 4932691   | 0.4235        | 372752       | 4932691   | 0.0756        | 586794       | 4932691   | 0.1190        | 62242        | 4932691   | 0.0126        | 618794       | 4932691   | 0.1254        |
|         | 1441689      | 5763604   | 0.2501        | 2357924      | 5763604   | 0.4091        | 2181788      | 5763604   | 0.3785        | 576644       | 5763604   | 0.1000        | 562513       | 5763604   | 0.0976        | 61247        | 5763604   | 0.0106        | 834573       | 5763604   | 0.1448        |
|         | 561887       | 1776521   | 0.3163        | 1010430      | 1776521   | 0.5688        | 911573       | 1776521   | 0.5131        | 155794       | 1776521   | 0.0877        | 244221       | 1776521   | 0.1375        | 17589        | 1776521   | 0.0099        | 233886       | 1776521   | 0.1317        |
| Mean    | 1134181.0    | 4157605.3 | 0.2833        | 1875188.7    | 4157605.3 | 0.4785        | 1727428.7    | 4157605.3 | 0.4384        | 368396.7     | 4157605.3 | 0.0878        | 464509.3     | 4157605.3 | 0.1180        | 47026.0      | 4157605.3 | 0.0110        | 426340.0     | 3354606.0 | 0.1286        |
| Std Dev | 496081.3     | 2103515.2 | 0.0331        | 750594.0     | 2103515.2 | 0.0819        | 708075.7     | 2103515.2 | 0.0685        | 210458.8     | 2103515.2 | 0.0122        | 191161.2     | 2103515.2 | 0.0200        | 25498.0      | 2103515.2 | 0.0014        | 272171.1     | 2231749.2 | 0.0044        |
| CV      | 43.74%       | 50.59%    | 11.67%        | 40.03%       | 50.59%    | 17.11%        | 40.99%       | 50.59%    | 15.63%        | 57.13%       | 50.59%    | 13.95%        | 41.15%       | 50.59%    | 16.91%        | 54.22%       | 50.59%    | 12.73%        | 63.84%       | 66.53%    | 3.41%         |
| 2 mL    | 1355079      | 5946378   | 0.2279        | 1949260      | 5946378   | 0.3278        | 1934413      | 5946378   | 0.3253        | 45920        | 5946378   | 0.0077        | 536028       | 5946378   | 0.0901        | 44180        | 5946378   | 0.0074        | 777486       | 5946378   | 0.1307        |
|         | 1533518      | 5891277   | 0.2603        | 2202014      | 5891277   | 0.3738        | 2182624      | 5891277   | 0.3705        | 49014        | 5891277   | 0.0083        | 568402       | 5891277   | 0.0965        | 61326        | 5891277   | 0.0104        | 853933       | 5891277   | 0.1449        |
|         | 1390695      | 6618765   | 0.2101        | 1968095      | 6618765   | 0.2974        | 1925309      | 6618765   | 0.2909        | 57526        | 6618765   | 0.0087        | 522841       | 6618765   | 0.0790        | 54363        | 6618765   | 0.0082        | 879523       | 6618765   | 0.1329        |
| Mean    | 1426430.7    | 6152140.0 | 0.2328        | 2039789.7    | 6152140.0 | 0.3330        | 2014115.3    | 6152140.0 | 0.3289        | 50820.0      | 6152140.0 | 0.0082        | 542423.7     | 6152140.0 | 0.0885        | 53289.7      | 6152140.0 | 0.0087        | 879523.0     | 6618765.0 | 0.1329        |
| Std Dev | 94434.6      | 405047.2  | 0.0254        | 140805.7     | 405047.2  | 0.0385        | 146003.8     | 405047.2  | 0.0399        | 6010.1       | 405047.2  | 0.0005        | 23444.2      | 405047.2  | 0.0089        | 8623.2       | 405047.2  | 0.0015        | 53088.8      | 405047.2  | 0.0077        |
| CV      | 6.62%        | 6.58%     | 10.93%        | 6.90%        | 6.58%     | 11.55%        | 7.25%        | 6.58%     | 12.14%        | 11.83%       | 6.58%     | 5.93%         | 4.32%        | 6.58%     | 10.00%        | 16.18%       | 6.58%     | 17.79%        | 6.04%        | 6.12%     | 5.76%         |
| 3 mL    | 1387067      | 5959096   | 0.2328        | 2037785      | 5959096   | 0.3420        | 2045755      | 5959096   | 0.3433        | 111242       | 5959096   | 0.0187        | 525325       | 5959096   | 0.0882        | 54377        | 5959096   | 0.0091        | 896597       | 5959096   | 0.1505        |
|         | 1175111      | 5602973   | 0.2097        | 1808657      | 5602973   | 0.3228        | 1731170      | 5602973   | 0.3090        | 87572        | 5302973   | 0.0165        | 416847       | 5602973   | 0.0744        | 39227        | 5602973   | 0.0070        | 683302       | 5602973   | 0.1220        |
|         | 1233994      | 6254875   | 0.1973        | 1670446      | 6254875   | 0.2671        | 1831480      | 6254875   | 0.2928        | 89453        | 6254875   | 0.0143        | 464531       | 6254875   | 0.0743        | 44659        | 6254875   | 0.0071        | 752669       | 6254875   | 0.1203        |
| Mean    | 1265390.7    | 5938981.3 | 0.2133        | 1838962.7    | 5938981.3 | 0.3106        | 1869468.3    | 5938981.3 | 0.3150        | 96089.0      | 5838981.3 | 0.0165        | 468901.0     | 5938981.3 | 0.0789        | 46087.7      | 5938981.3 | 0.0078        | 824633.0     | 6106985.5 | 0.1354        |
| Std Dev | 109410.5     | 326416.2  | 0.0180        | 185535.2     | 326416.2  | 0.0389        | 160696.2     | 326416.2  | 0.0258        | 13156.5      | 487185.8  | 0.0022        | 54370.9      | 326416.2  | 0.0080        | 7675.4       | 326416.2  | 0.0012        | 108797.8     | 326416.2  | 0.0213        |
| CV      | 8.65%        | 5.50%     | 8.44%         | 10.09%       | 5.50%     | 12.53%        | 8.60%        | 5.50%     | 8.18%         | 13.69%       | 8.34%     | 13.24%        | 11.60%       | 5.50%     | 10.11%        | 16.65%       | 5.50%     | 15.32%        | 13.19%       | 5.34%     | 15.73%        |

Mean values  $\pm$  standard deviation and coefficient of variation.

**Table S4.** Evaluation of the influence of the drying time of the samples (n = 3) in the extraction process.

|             | FLX          |           |               | VLX          |           |               | DVLX         |           |               | NFLX         |           |               | CIT          |           |               | SRT          |           |               | PXT          |           |               |
|-------------|--------------|-----------|---------------|--------------|-----------|---------------|--------------|-----------|---------------|--------------|-----------|---------------|--------------|-----------|---------------|--------------|-----------|---------------|--------------|-----------|---------------|
|             | Analyte Area | PI Area   | Relative Area | Analyte Area | PI Area   | Relative Area | Analyte Area | PI Area   | Relative Area | Analyte Area | PI Area   | Relative Area | Analyte Area | PI Area   | Relative Area | Analyte Area | PI Area   | Relative Area | Analyte Area | PI Area   | Relative Area |
| <b>1h</b>   | 654828       | 2041526   | 0.3208        | 1051699      | 2041526   | 0.5152        | 960109       | 2041526   | 0.4703        | 150272       | 3291526   | 0.0457        | 259581       | 2041526   | 0.1272        | 19237        | 2041526   | 0.0094        | 212379       | 2041526   | 0.1040        |
|             | 1112530      | 4921158   | 0.2261        | 1977254      | 4921158   | 0.4018        | 1630358      | 4921158   | 0.3313        | 192915       | 4921158   | 0.0392        | 441408       | 4921158   | 0.0897        | 40568        | 4921158   | 0.0082        | 618248       | 4921158   | 0.1256        |
|             | 922869       | 3362676   | 0.2744        | 1801136      | 3362676   | 0.5356        | 1589765      | 3362676   | 0.4728        | 174892       | 3362676   | 0.0520        | 387835       | 3362676   | 0.1153        | 34874        | 3362676   | 0.0104        | 394954       | 3362676   | 0.1175        |
| Mean        | 896742.3     | 3441786.7 | 0.2738        | 1610029.7    | 3441786.7 | 0.4842        | 1393410.7    | 3441786.7 | 0.4248        | 172693.0     | 3858453.3 | 0.0456        | 362941.3     | 3441786.7 | 0.1107        | 31559.7      | 3441786.7 | 0.0093        | 408527.0     | 3441786.7 | 0.1157        |
| Std Dev     | 229966.8     | 1441445.1 | 0.0473        | 491481.7     | 1441445.1 | 0.0721        | 375798.7     | 1441445.1 | 0.0810        | 21406.4      | 921016.6  | 0.0064        | 93434.7      | 1441445.1 | 0.0191        | 11045.0      | 1441445.1 | 0.0011        | 203274.6     | 1441445.1 | 0.0095        |
| CV          | 25.64%       | 41.88%    | 17.29%        | 30.53%       | 41.88%    | 14.89%        | 26.97%       | 41.88%    | 19.06%        | 12.40%       | 23.87%    | 14.04%        | 25.74%       | 41.88%    | 17.29%        | 35.00%       | 41.88%    | 11.40%        | 49.76%       | 41.88%    | 8.20%         |
| <b>6h30</b> | 818099       | 6425327   | 0.1273        | 1880877      | 6425327   | 0.2927        | 1565901      | 6425327   | 0.2437        | 61637        | 6425327   | 0.0096        | 341922       | 6425327   | 0.0532        | 29308        | 6425327   | 0.0046        | 612225       | 6425327   | 0.0953        |
|             | 1020424      | 8182978   | 0.1247        | 2142416      | 8182978   | 0.2618        | 1658741      | 8182978   | 0.2027        | 80810        | 8182978   | 0.0099        | 366379       | 8182978   | 0.0448        | 33851        | 8182978   | 0.0041        | 762445       | 8182978   | 0.0932        |
|             | 1165488      | 9517734   | 0.1225        | 2321198      | 9517734   | 0.2439        | 1771756      | 9517734   | 0.1862        | 84059        | 9517734   | 0.0088        | 433822       | 9517734   | 0.0456        | 38888        | 9517734   | 0.0041        | 895593       | 9517734   | 0.0941        |
| Mean        | 1001337.0    | 8042013.0 | 0.1248        | 2114830.3    | 8042013.0 | 0.2661        | 1665466.0    | 8042013.0 | 0.2109        | 75502.0      | 8042013.0 | 0.0094        | 380707.7     | 8042013.0 | 0.0479        | 34015.7      | 8042013.0 | 0.0043        | 756754.3     | 8042013.0 | 0.0942        |
| Std Dev     | 174479.3     | 1551015.3 | 0.0024        | 221452.9     | 1551015.3 | 0.0247        | 103092.1     | 1551015.3 | 0.0296        | 12116.8      | 1551015.3 | 0.0005        | 47596.1      | 1551015.3 | 0.0047        | 4792.1       | 1551015.3 | 0.0003        | 141769.7     | 1551015.3 | 0.0011        |
| CV          | 17.42%       | 19.29%    | 1.95%         | 10.47%       | 19.29%    | 9.28%         | 6.19%        | 19.29%    | 14.05%        | 16.05%       | 19.29%    | 5.72%         | 12.50%       | 19.29%    | 9.73%         | 14.09%       | 19.29%    | 6.13%         | 18.73%       | 19.29%    | 1.12%         |
| <b>12h</b>  | 843898       | 4147471   | 0.2035        | 1565663      | 4147471   | 0.3775        | 1480123      | 4147471   | 0.3569        | 83412        | 4207471   | 0.0198        | 373510       | 4147471   | 0.0901        | 30997        | 4147471   | 0.0075        | 475822       | 4147471   | 0.1147        |
|             | 1082296      | 5695246   | 0.1900        | 2082847      | 5695246   | 0.3657        | 1731406      | 5695246   | 0.3040        | 97408        | 5695246   | 0.0171        | 421608       | 5695246   | 0.0740        | 39176        | 5695246   | 0.0069        | 682954       | 5695246   | 0.1199        |
|             | 1064538      | 6455256   | 0.1649        | 2020334      | 6455256   | 0.3130        | 1793964      | 6455256   | 0.2779        | 146243       | 6455256   | 0.0227        | 469487       | 6455256   | 0.0727        | 40825        | 6455256   | 0.0063        | 741202       | 6455256   | 0.1148        |
| Mean        | 996910.7     | 5432657.7 | 0.1861        | 1889614.7    | 5432657.7 | 0.3521        | 1668497.7    | 5432657.7 | 0.3129        | 109021.0     | 5452657.7 | 0.0199        | 421535.0     | 5432657.7 | 0.0789        | 36999.3      | 5432657.7 | 0.0069        | 633326.0     | 5432657.7 | 0.1148        |
| Std Dev     | 132810.0     | 1176087.7 | 0.0196        | 282286.2     | 1176087.7 | 0.0344        | 166108.8     | 1176087.7 | 0.0402        | 32986.1      | 1143359.6 | 0.0028        | 47988.5      | 1176087.7 | 0.0097        | 5263.2       | 1176087.7 | 0.0006        | 139477.0     | 1176087.7 | 0.0001        |
| CV          | 13.32%       | 21.65%    | 10.52%        | 14.94%       | 21.65%    | 9.76%         | 9.96%        | 21.65%    | 12.86%        | 30.26%       | 20.97%    | 13.98%        | 11.38%       | 21.65%    | 12.23%        | 14.23%       | 21.65%    | 8.34%         | 22.02%       | 21.65%    | 0.06%         |

Mean values ± standard deviation and coefficient of variation

**Table S5.** Concentrations used in the recovery study.

| Compound | Concentrations (ng/mL) |     |     |
|----------|------------------------|-----|-----|
| FLX      | 80                     | 200 | 400 |
| VLX      | 90                     | 180 | 300 |
| DVLX     | 120                    | 240 | 400 |
| NFLX     | 30                     | 60  | 100 |
| CIT      | 60                     | 120 | 200 |
| SRT      | 60                     | 120 | 200 |
| PXT      | 30                     | 60  | 100 |

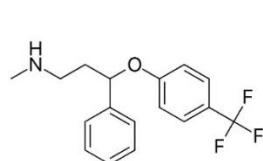

**Fluoxetine hydrochloride**  
Molecular Weight: 345.8 g/mol

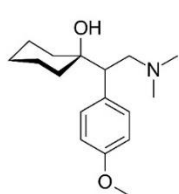

**Venlafaxine hydrochloride**  
Molecular Weight: 313.9 g/mol

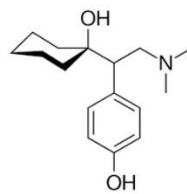

**O-desmethylvenlafaxine**  
Molecular Weight: 263.4 g/mol

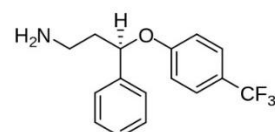

**Norfluoxetine**  
Molecular Weight: 295.3 g/mol

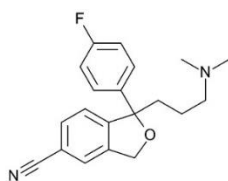

**Citalopram**  
Molecular Weight: 324.4 g/mol

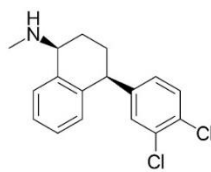

**Sertraline hydrochloride**  
Molecular Weight: 342.7 g/mol

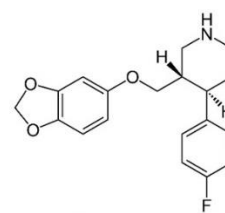

**Paroxetine**  
Molecular Weight: 329.4 g/mol

**Figure S2.** Molecular structures and molecular weights of the target analytes.
